# Supplementary material for: Perturbations in gut and respiratory microbiota in COVID-19 and influenza patients: a systematic review and meta-analysis
Source: Front Med (Lausanne). 2024 Feb 9;11:1301312. doi: 10.3389/fmed.2024.1301312 (PMC10884097; doi:10.3389/fmed.2024.1301312)
Supplement: Supplementary file 2 [file Data_Sheet_2.xlsx]

## Sheet: Content
Supplementary Table S4: Quality assessment of the included studies of COVID-19 using the Newcastle‐Ottawa Scale Supplementary Table S5:Summary of relative abundance of gut microbes involving COVID-19 Supplementary Table S5:Quality assessment of the included studies of influenza using the Newcastle‐Ottawa Scale Supplementary Table S6:Summary of relative abundance of gut microbes involving influenza

## Sheet: Supplementary Table S4
First author & publication year	Selection				Comparability		Exposure
	Is the Case Definition Adequate?	Representativeness of the Cases	Selection of Controls	Definition of Controls	Comparability of baseline characteristic 1 (Sex)	Comparability of baseline characteristic 2 (age)	Ascertainment of Exposure	Same method of ascertainment for cases and controls	Non-Response rate	Total
Gu 2020	*	*	*	*	*	*	NR	NR	*	7
De Maio 2020	*	*	*	*	NR	NR	NR	NR	*	5
Mostafa 2020	*	*	*	*	NR	NR	NR	NR	*	5
Tang 2020	*	*	*	*	*	NR	NR	NR	*	6
Zhang 2021	*	*	*	*	*	*	NR	NR	*	7
Zuo 2020	*	*	*	*	NR	NR	NR	NR	*	5
Hoque 2021-2	NR	NR	*	NR	NR	NR	NR	NR	*	2
Zuo 2021	*	*	*	*	NR	NR	NR	NR	*	5
Bataineh 2021	*	*	*	*	NR	NR	NR	NR	*	5
Braun 2021	*	*	*	*	NR	NR	NR	NR	*	5
Britton 2021	*	*	*	*	NR	NR	NR	NR	*	5
Cao 2021	*	*	*	*	NR	NR	NR	NR	*	5
Nagy-Szakal 2021	*	*	*	*	NR	NR	NR	NR	*	5
Engen 2021	*	*	*	*	NR	NR	NR	NR	*	5
Gaibani 2021-1	*	*	*	NR	*	*	NR	NR	*	6
Gaibani 2021-2	*	*	*	*	*	*	NR	NR	*	7
Gao 2021	*	*	*	*	*	*	*	*	*	9
Gupta 2021-1	*	*	*	*	NR	NR	NR	NR	*	5
Gupta 2021-2	*	*	*	*	NR	NR	NR	NR	*	5
He 2021	*	*	*	NR	NR	NR	NR	NR	*	4
Hernández‑Terán 2021	*	*	*	*	NR	NR	NR	NR	*	5
Hoque 2021-1	*	*	*	*	NR	NR	NR	NR	*	5
Iebba 2021	*	*	*	*	NR	*	NR	NR	*	6
Khan 2021	*	*	*	*	NR	NR	NR	NR	*	5
Kim 2021	*	*	*	*	NR	NR	NR	NR	*	5
Li 2021	*	*	*	*	*	*	NR	NR	*	7
Liu 2022-1	*	*	*	*	*	*	NR	NR	*	7
Liu 2021	*	*	*	*	*	*	NR	NR	*	7
Liu 2022-2	*	*	*	*	*	NR	NR	NR	*	6
Ma 2021	*	*	*	NR	NR	NR	NR	NR	*	4
Mazzarelli 2021	*	*	*	*	NR	*	NR	NR	*	6
Merenstein 2021	*	*	*	*	NR	NR	NR	NR	*	5
Miller 2021	*	*	*	*	*	*	NR	NR	*	7
Moreira-Rosário 2021	*	*	*	*	*	NR	NR	NR	*	6
Nardelli 2021	*	*	*	*	NR	NR	NR	NR	*	5
Newsome 2021	*	*	*	*	NR	NR	NR	NR	*	5
Ng 2021	*	*	*	*	NR	*	NR	NR	*	6
Ren 2021-1	*	*	*	*	*	*	*	*	*	9
Ren 2021-2	*	*	*	*	*	NR	NR	NR	*	6
Rhoades 2021	*	*	*	*	*	*	NR	NR	*	7
Rosas-Salazar 2021	*	*	*	*	*	*	NR	NR	*	7
Rueca 2021	*	*	*	NR	NR	NR	NR	NR	*	4
Smith 2021	*	*	*	*	NR	*	NR	NR	*	6
Soffritti 2021	*	*	*	*	*	*	NR	NR	*	7
Sulaiman1 2021	*	*	*	*	*	*	*	*	*	9
Tian 2021	*	*	*	NR	*	*	NR	NR	*	6
Ventero1 2021	*	*	*	*	NR	NR	NR	NR	*	5
Ventero1 2022	*	*	*	*	NR	NR	NR	NR	*	5
Wu 2021	*	*	*	*	*	*	NR	NR	*	7
Xiong 2021	*	*	*	NR	NR	NR	NR	NR	*	4
Xu 2021	*	*	*	NR	NR	*	NR	NR	*	5
Yeoh 2021	*	*	*	*	NR	NR	NR	NR	*	5
Zhang 2021	*	*	*	*	*	*	NR	NR	*	7
Zhou 2021-1	*	*	*	*	*	*	NR	NR	*	7
Zhou 2021-2	*	*	*	*	*	*	NR	NR	*	7
Albrich 2022	*	*	*	*	NR	NR	NR	NR	*	5
Bai 2022	*	*	*	*	NR	NR	NR	NR	*	5
Bradley 2022	*	*	*	*	*	*	NR	NR	*	7
Callahan 2022	*	*	*	*	*	*	NR	NR	*	7
Chen 2022	*	*	*	*	*	NR	NR	NR	*	6
Cui 2022	*	*	*	*	*	*	NR	NR	*	7
Cuenca 2022	*	*	*	*	*	*	NR	NR	*	7
Devi 2022	*	*	*	*	NR	NR	NR	NR	*	5
Ferrari 2022	*	*	*	*	NR	NR	NR	NR	*	5
Ferreira-Junior 2022	*	*	*	*	*	*	NR	NR	*	7
Gan 2022	*	*	*	*	NR	NR	NR	NR	*	5
Gauthier 2022	*	*	*	NR	*	NR	NR	NR	*	5
Giugliano 2022	*	*	*	*	NR	NR	NR	NR	*	5
Hazan 2022	*	*	*	*	*	*	NR	NR	*	7
Hurst 2022	*	*	*	*	*	NR	NR	NR	*	6
Jitvaropas 2022	NR	*	*	NR	NR	NR	NR	NR	*	3
Juárez-Castelán 2022	*	*	*	*	*	*	NR	NR	*	7
Kumar 2022	*	*	*	*	NR	NR	NR	NR	*	5
Lai 2022	*	*	*	*	*	*	*	*	*	9
Maeda 2022	*	*	*	NR	*	*	NR	NR	*	6
Maurer 2022	*	*	*	*	*	NR	NR	NR	*	6
Mazzarelli 2022	*	*	*	*	*	*	NR	NR	*	7
Meng 2022	*	*	*	*	*	*	NR	NR	*	7
Mizutani 2022	*	*	*	*	NR	*	NR	NR	*	6
Nobre 2022	*	*	*	*	NR	NR	NR	NR	*	5
Paine 2022	*	*	*	*	NR	NR	NR	NR	*	5
POLO 2022	*	*	*	*	NR	NR	NR	NR	*	5
Pozzi 2022	*	*	*	*	NR	NR	NR	NR	*	5
Prasad 2022	*	*	*	*	NR	NR	NR	NR	*	5
Qin 2022	*	*	*	*	NR	NR	NR	NR	*	5
Rafiqul Islam 2022	*	*	*	*	NR	NR	NR	NR	*	5
Rattanaburi 2022	*	*	*	*	NR	*	NR	NR	*	6
Reinold 2021	*	*	*	*	*	NR	NR	NR	*	6
Rocafort 2022	*	*	*	*	*	*	NR	NR	*	7
Romani 2022	*	*	*	*	*	*	NR	NR	*	7
Schult 2022	*	*	*	*	*	*	NR	NR	*	7
Shen 2022	*	*	*	*	*	NR	NR	NR	*	6
Shi 2022	*	*	*	*	NR	NR	NR	NR	*	5
Shilts 2022	*	*	*	*	*	NR	NR	NR	*	6
Stutz 2022	*	*	*	*	*	*	NR	NR	*	7
Sun 2022	*	*	*	*	NR	NR	NR	NR	*	5
Suskun 2022	*	*	*	*	NR	NR	NR	NR	*	5
Tchoupou Saha 2022	*	*	*	*	NR	NR	NR	NR	*	5
Upadhyay 2022	*	*	*	*	NR	*	NR	NR	*	6
Vestad 2022	*	*	*	*	*	NR	NR	NR	*	6
Xu 2022	*	*	*	NR	NR	NR	NR	NR	*	4
Yin 2022	*	*	*	*	*	NR	NR	NR	*	6
Yokoyama 2022	*	*	*	*	NR	NR	NR	NR	*	5
Zacharias 2022	*	*	*	*	NR	*	NR	NR	*	6
Zhou 2022-1	*	*	*	NR	*	*	NR	NR	*	6
Al-Emran 2023	*	*	*	*	*	*	NR	NR	*	7
Alqedari 2023	*	*	*	*	*	NR	NR	NR	*	6
Chen 2023	*	*	*	*	*	*	NR	NR	*	7
de Nies 2023	*	*	*	*	*	*	NR	NR	*	7
Guo 2023	*	*	*	*	NR	NR	NR	NR	*	5
Gutiérrez-Díaz 2023	*	*	*	*	NR	*	NR	NR	*	6
Hyblova 2023	*	*	*	*	NR	NR	NR	NR	*	5
Javan 2023	*	*	*	*	NR	NR	NR	NR	*	5
Jiang 2023	*	*	*	NR	*	NR	NR	NR	*	5
Kim 2023	*	*	*	*	*	NR	NR	NR	*	6
Larios Serrato 2023	*	*	*	*	NR	NR	NR	NR	*	5
Leftwich 2023	*	*	*	*	*	NR	NR	NR	*	6
Ling 2023	*	*	*	NR	NR	NR	NR	NR	*	4
Lu 2023	*	*	*	NR	*	NR	NR	NR	*	5
Mahmud 2023	*	*	*	*	NR	NR	NR	NR	*	5
Mankowska-Wierzbicka 2023	*	*	*	*	*	*	NR	NR	*	7
Mannan 2023	*	*	*	*	*	*	NR	NR	*	7
Nagata 2023	*	*	*	*	*	*	NR	NR	*	7
Rosas-Salazar2023	*	*	*	*	*	*	NR	NR	*	7
Talukdar 2023	*	*	*	*	NR	NR	NR	NR	*	5
Trøseid 2023	*	*	*	*	*	*	NR	NR	*	7
Wang 2023	*	*	*	*	*	*	NR	NR	*	7
Wei 2023	*	*	*	*	NR	NR	NR	NR	*	5
Wu 2023	*	*	*	*	*	*	NR	NR	*	7
Xie 2023	*	*	*	*	*	*	NR	NR	*	7
Yasir 2023	*	*	*	*	NR	NR	NR	NR	*	5
Zhang 2023-1	*	*	*	*	*	*	NR	NR	*	7
Zhang 2023-2	*	*	*	*	*	*	NR	NR	*	7
Zhou 2022-2	*	*	*	*	*	*	NR	NR	*	7

## Sheet: Supplementary Table S5
First author & publication year	Country	Specimen	Disease	Control	Numbel (D/C)	Age (D/C)	Male % ( D/C)	Sequencing Platform	Preservation condition	Microbiome assessment method	Multiple comparisons correction?	α-microbial diversity										β-microbial diversity						Phylum										Actinobacteria	Actinomycetales	Actinomyces	Acidobacteria	Actinomyces viscosus	Actinomyces timonensis	Actinomyces oris	Actinomyces naeslundii	Actinomyces massiliensis	Actinomyces johnsonii	Actinomyces graevenitzii	Actinomyces cardiffensis
												α-microbial diversity of bacterial species	Faith’s phylogenetic index	observed ASVs	Abundance	Richness	Shannon index	Inverse Simpson index	Chao1 index	PD-whole-tree	ACE	Binary euclidean distance	Bray-Curtis distances	Jaccard distances	Binary-Jaccard distances	Weighted UniFrac distance	Unweighted UniFrac distance	Actinobacteria	Bacteroidetes	Cyanobacteria	Deferribacteres	Firmicutes	Proteobacteria	Tenericutes	Synergistetes	Verrucomicrobia	Firmicutes/Bacteroidetes ratio
Covid-19 vs no Covid-19 control Gut
Gu 2020	China	Stool	COVID	HC	30/30	55/53.5	43.3/43.3	Illumina Platform	-80°C	16S rRNA gene sequencing ( V3-V5)	Yes
Zuo 2020	China	Stool	COVID(antibiotics-naïve)	HC	7/15	NR/48	NR/60	Illumina Platform	NR	Shotgun metagenomic sequencing analyses	NR
Bataineh 2021	United Arab Emirates	Stool	COVID	HC	86/57	NR/NR	60.5/24.6	Illumina Platform	-80°C	16S rRNA gene sequencing ( V3,V4)	NR
Cao 2021	China	Stool	COVID	HC	13/5	48/NR	46.2/NR	Illumina Platform	NR	Metagenomic sequencing analyses	Yes
Gaibani 2021-1	Italy	Stool	COVID	HC	69/69	73/59	55.1/43.5	Illumina Platform	-80°C	16S rRNA gene sequencing( V3-V4)	Yes
He 2021	China	Stool	COVID	HC	13/21	26.9/43	76.9/57.1	NR	-80°C	Metaproteomics	Yes
Kim 2021	Korea	Stool	COVID	HC	12/36	26/NR	66.7/NR	Illumina Platform	NR	16S rRNA gene sequencing ( V3,V4)	Yes
Khan 2021	India	Stool	COVID(asymptomatic)	HC	NR/10	57.9/NR	NR/NR	NR	NR	16S rRNA gene sequencing ( V3–V4)	NR
			COVID(Mild)	HC	NR/10	49.4/NR	NR/NR
			COVID(Severe)	HC	NR/10	45.9/NR	NR/NR
Li 2021	China	Stool	COVID	HC	37/10	44.1/37.4	51.4/70	Bgiseq-500 Platform	-80°C	Metagenome Sequencing	Yes
Ren 2021-1	China	Stool	COVID	HC	24/48	48./48.5	58.3/52.1	Illumina Platform	-80°C	16S rRNA gene sequencing (V3-V5)	NR
Wu 2021	China	Stool	COVID	HC	50/32	45/46.5	63.9/65.6	Illumina Platform	NR	16S rRNA gene sequencing (V3-V4)	Yes
Xu 2021	China	Stool	COVID	HC	9/14	6.4/5.6	44.4/67.5	Illumina Platform	-80°C	16S rRNA gene sequencing ( V4)	Yes
Yeoh 2021	China	Stool	COVID	No COVID	87/78	35.6/45.5	54/42.3	Illumina Platform	-80°C	Shotgun metagenomic sequencing analyses	NR
Cui 2022	China	Stool	COVID	HC	25/72	47.2/47	32/34.7	Illumina Platform	-80°C	16S rRNA gene sequencing ( V3-V5)	NR
Cuenca 2022	Spain	Stool、Rectal Swab	COVID(ICU)	HC	46/17	61/55	70/47.7	Illumina Platform	-80°C	16S rRNA gene sequencing ( V4)	Yes
Hazan 2022	America	Stool	COVID	No COVID	50/20	53/48	48/35	Illumina Platform	-20°C	Metagenome Sequencing	Yes
Juárez-Castelán 2022	Mexico	Rectal Swabs	COVID	No COVID	33/17	25.5/25.5	0/0	NR	-80°C	16S rRNA gene sequencing (V3)	NR
			COVID	No COVID	25/25	0/0	68/68
Liu 2022-1	China	Stool	COVID	No COVID	50/68	NR/47.2	NR/47.1	Illumina Platform	-80°C	Metagenome Sequencing	Yes
Maeda 2022	Japan	Stool	COVID(Mild)	HC	38/30	72/64	57.9/66.7	Illumina Platform	-20°C	16S rRNA gene sequencing ( V1–V2)，	NR
			COVID(Severe)	HC	40/30	72/64	75/66.7
Mizutani 2022	Japan	Stool	COVID	HC	22/40	42/42	81.8/100	Illumina Platform	-80°C	16S rRNA gene sequencing ( V3–V4)	NR
Nobre 2022	Portugal	Stool	COVID(Mild)	HC	8/7	64.5/33.4	62.5/42.9	Illumina Platform	-20°C	16S rRNA gene sequencing ( V3-V4)	NR
			COVID(Severe)	HC	27/7	63.6/33.4	66.7/42.9
Rafiqul Islam 2022	Bangladesh	Stool	COVID	HC	22/15	NR/NR	NR/NR	Illumina Platform	NR	16S rRNA gene sequencing ( V3–V4)	Yes
Romani 2022	Italy	Stool	COVID	HC	68/95	6.5/NR	56/NR	Illumina Platform	-80°C	16S rRNA gene sequencing (V3-V4)	Yes
Schult 2022	Germany	Stool	COVID	No COVID	108/26	62/63	54.6/57.7	Illumina Platform	NR	16S rRNA gene sequencing ( V3–V4)	Yes
Suskun 2022	Turkey	Stool	COVID	HC	20/19	9.5/8	50/57.9	Illumina Platform	-80°C	16S rRNA gene sequencing ( V3–V4)	Yes
Sun 2022	China	Stool	COVID	No COVID	63/8	48/37	61.9/37.5	Illumina Platform	-80°C	Metagenome Sequencing	Yes
Upadhyay 2022	America	Stool	COVID	No COVID	14/4	44.8/44.8	21.4/75	Illumina Platform	-80°C	16S rRNA gene sequencing (V4), Metagenome Sequencing	Yes
Xu 2022	China	Stool	COVID(Mild or Moderate)	HC	24/31	51/NR	70.8/NR	Illumina Platform	-80°C	Metagenome Sequencing	NR
			COVID(Severe/Critical)	HC	14/31	60.5/NR	71.4/NR
Yin 2022	America	Stool	COVID	HC	20/20	58/41	60/60	Illumina Platform	-80°C	16S rRNA gene sequencing ( V5)	Yes
Zhang 2022	China	Stool	COVID	No COVID	66/70	42.6/45.8	59.1/41	Illumina Platform	-80°C	Metagenome Sequencing	Yes
Zhou 2022-1	China	Stool	COVID	HC	13/13	24/26	76/76	Illumina Platform	-80°C	Metatranscriptome sequencing	Yes
de Nies 2023	Luxembourg	Stool	COVID	No COVID	61/57	43.9/42.1	63.9/61.4	Illumina Platform	-80°C	Metagenomic and metatranscriptomic sequencing	Yes
Gutiérrez-Díaz 2023	Spain	Stool	COVID	No COVID	11/9	1.9/1.7(month)	27.3/88,9	Illumina Platform	-80°C	16S rRNA gene sequencing (V3)	NR
			COVID	No COVID	8/9	17/11(month)	37.5/55.6
Leftwich 2023	America	Stool	COVID	HC	46/12	NR/NR	0/0	Illumina Platform	NR	16S rRNA gene sequencing (V3-V4)	NR
Mannan 2023	Bangladesh	Stool	COVID	HC	12/10	40.5/49.3	66.7/80	Illumina Platform	-80°C	16S rRNA gene sequencing (V3-V4)	Yes
Nagata 2023	Japan	Stool	COVID	HC	112/112	33.9/33	65.2/63.4	Illumina Platform	-80°C	Metagenome Sequencing	Yes
Wang 2023	China	Stool	COVID	HC	59/52	4.8/5	49.2/30.8	Illumina Platform	-80°C	16S rRNA gene sequencing (V3-V4)	NR
Zhang 2023-1	China	Stool	COVID	HC	45/25	40.5/35.6	60/52	Illumina Platform	-80°C	Metagenome sequenc_x005f_x005f_x005f_x005f_x005f_x005f_x005f_x005f_x005f_x005f_x005f_x005f_x005f_x005f_x005f_x005f_x005f_x005f_x005f_x0002_ing	Yes
Covid-19(recovered) vs no Covid-19 control Gut
Kim 2021	Korea	Stool	COVID(Recovered)	HC	12/36	26/NR	66.7/NR	Illumina Platform	NR	16S rRNA gene sequencing ( V3,V4)	Yes
Tian 2021	China	Stool	COVID(Recovered)	HC	7/7	38/32.8	100/100	Illumina Platform	-80°C	16S rRNA gene sequencing ( V3-V4)	NR
Yeoh 2021	China	Stool	COVID(Recovered)	No COVID	100/78	36.4/45.5	53/42.3	Illumina Platform	-80°C	Shotgun metagenomic sequencing analyses	NR
Zhou 2021-1	China	Stool	COVID(Recovered)	HC	15/14	29/37.5	20/35.7	Illumina Platform	-80°C	16S rRNA gene sequencing ( V3–V4)	NR
Cui 2022	China	Stool	COVID(Recovered)	HC	25/72	48.2/47	32/34.7	Illumina Platform	-80°C	16S rRNA gene sequencing ( V3-V5)	NR
Ferreira-Junior 2022	Brazil	Stool	COVID(Recovered)	HC	159/71	42.5/46.1	32.1/28.2	Illumina Platform	-80°C	16S rRNA gene sequencing (V3,V4)	Yes
Maeda 2022	Japan	Stool	COVID(Recovered)	HC	10/30	NR/NR	NR/NR	Illumina Platform	-20°C	16S rRNA gene sequencing ( V1–V2)，	NR
Nobre 2022	Portugal	Stool	COVID(Recovered)	HC	45/7	56.3/33.4	22.2/42.9	Illumina Platform	-20°C	16S rRNA gene sequencing ( V3-V4)	NR
POLO 2022	Turkey	Stool	COVID(Recovered)	No COVID	8/8	41/32	50/25	Illumina Platform	-80°C	16S rRNA gene sequencing ( V3-V4)，QPCR	NR
Schult 2022	Germany	Stool	COVID(Recovered)	No COVID	22/26	65/63	81.8/57.7	Illumina Platform	NR	16S rRNA gene sequencing ( V3–V4)	Yes
Zhou 2022-2	China	Stool	COVID(Recovered)	HC	13/13	24/26	76/76	Illumina Platform	-80°C	Metatranscriptome sequencing	Yes
Mankowska-Wierzbicka 2023	Poland	Stool	COVID(Recovered)	HC	8/14	34.9/37	37.5/78.6	Illumina Platform	-80°C	16S rRNA gene sequencing (V1-V9)	Yes
Zhang 2023-2	China	Stool	COVID(Recovered)	HC	75/32	62/57.5	58.7/40.6	Illumina Platform	-80°C	16S rRNA gene sequencing (V3-V4)	NR
Long Covid-19 vs no Covid-19 control Gut
Liu 2022-1	China	Stool	COVID(long COVID-19)	No COVID	50/68	NR/47.2	NR/47.1	Illumina Platform	-80°C	Metagenome Sequencing	Yes
Zhang 2023-2	China	Stool	COVID(long COVID-19 )	HC	55/32	57/57.5	41.8/40.6	Illumina Platform	-80°C	16S rRNA gene sequencing (V3-V4)	NR
Zhang 2023-1	China	Stool	COVID(long COVID-19)	HC	45/25	40.5/35.6	60/52	Illumina Platform	-80°C	Metagenome sequenc_x005f_x005f_x005f_x005f_x005f_x005f_x005f_x005f_x005f_x005f_x005f_x005f_x005f_x005f_x005f_x005f_x005f_x005f_x005f_x0002_ing	Yes
Covid-19 vs no Covid-19 control Respiratory tract
De Maio 2020	Italy	Nasopharynx	COVID	No COVID	18/22	NR/NR	NR/NR	Illumina Platform		16S rRNA gene sequencing （ V5–V6）	NR
Mostafa 2020	America	Nasopharyngeal Swab	COVID	No COVID	40/10	NR/NR	NR/NR	Nano Pore Gridion X5	-80°C	Metagenomic sequencing	NR
Braun 2021	Israel	Nasopharyngeal	COVID	No COVID	32/29	52/NR	56/NR	Illumina Platform	NR	16S rRNA gene sequencing (V4)	Yes
Engen 2021	America	Nasopharyngeal Swab	COVID	No COVID	9/10	53.4/NR	33.3/NR	Silva 138	-80°C	16S rRNA gene sequencing ( V4)	Yes
Gao 2021	China	Oropharyngeal	COVID	HC	48/94	47/46	40/39.4	Illumina Platform	-80°C	16S rRNA gene sequencing ( V3–V4)	Yes
Gupta 2021-1	India	Nasopharyngeal Swabs	COVID	No COVID	63/26	37.5/25.1	66.7/46.2	Illumina Platform	NR	16S rRNA gene sequencing (v4)	NR
Gupta 2021-2	India	Saliva	COVID	No COVID	30/24	47/45	66.7/58.3	Illumina Platform	-80°C	16S rRNA gene sequencing ( V4)	Yes
Hernández‑Terán 2021	Mexico	Respiratory Samples	COVID(Mild)	HC	18/7	37/35	51.4/28.6	Illumina Platform	NR	16S rRNA gene sequencing ( V3–V4)	NR
			COVID(Severe)	HC	27/7	47/35	56/28.6
			COVID(Fatal)	HC	19/7	58/35	73.7/28.6
Hoque 2021-1	Bangladesh	Nasopharyngeal Tract	COVID	HC	8/7	39.6/48.1	75/71.4	Illumina Platform	-80°C	Metagenome Sequencing	NR
Iebba 2021	Italy	Oral-Pharyngeal And Oral Swabs	COVID	HC	26/15	67.3/NR	80.8/NR	NR	NR	16S rRNA gene sequencing ( V2–V3)	Yes
Ma 2021	China	Oropharynx Swab Specimens	COVID	HC	31/28	50/37	54.8/42.9	Mgiseq-2000 Platform	NR	Metagenome Sequencing	Yes
Nagy-Szakal 2021	America	Nasopharyngeal Swabs	COVID	No COVID	26/22	NR/NR	NR/NR	Illumina Platform	-70°C	Metagenomic sequencing analyses	NR
Nardelli 2021	Italy	Nasopharyngeal Swabs	COVID	No COVID	18/12	NR/NR	66.7/33.3	Illumina Platform	-80°C	16S rRNA gene sequencing (V1-V2-V3)	NR
Ng 2021	America	Nasopharyngeal Swab	COVID	No COVID	137/108	49/44	48/26.5	Illumina Platform	-80°C	Metatranscriptomic sequencing	NR
Rhoades 2021	America	Nasal	COVID	No COVID	68/45	54.3/54.6	63.1/46.7	Illumina Platform	NR	16S rRNA gene sequencing (v5)	Yes
Ren 2021-1	China	Tongue Coating Samples	COVID	HC	48/100	48.4/44.9	41.67/37	Illumina Platform	-80°C	16S rRNA gene sequencing (V3-V5)	NR
Ren 2021-2	China	Oropharyngeal Swab	COVID	HC	192/95	58/47	59/40	Illumina Platform	-80°C	Metatranscriptome sequencing	Yes
Rosas-Salazar 2021	America	Upper Respiratory Tract	COVID	No COVID	38/21	30.5/30	55.3/57.1	Illumina Platform	NR	16S rRNA gene sequencing (V4)	Yes
Rueca 2021	Italy	Nasal/Oropharyngeal Swabs	COVID(ICU)	HC	10/10	57/53.5	60/30	Ion S5 Sequencer	NR	16S rRNA sequencing(V2–4–8, V3–6, V7–9)	Yes
			COVID(Mild/ Moderate)	HC	11/10	50/53.5	27.3/30
Smith 2021	French	Nasopharynx Swabs	COVID(Moderate)	HC	15/12	NR/51	NR/72	Illumina Platform	NR	16S rRNA sequencing, QPCR	Yes
			COVID(Severe)	HC	11/12	NR/51	NR/72
			COVID(critital)	HC	23/12	NR/51	NR/72
Soffritti 2021	Italy	Oral Rinse	COVID	No COVID	39/36	71.1/66.5	51.3/61.1	Ion Gene Studio S5 System	-80°C	Whole Genome Sequencing	Yes
Ventero1 2021	Spain	Nasopharyngeal Swab	COVID	No COVID	56/18	64.2/48.1	58.9/50	Illumina Platform	-80°C	16S rRNA gene sequencing ( V3,V4)	Yes
Wu 2021	China	Throat Swab	COVID	HC	52/44	48.5/41.5	57.7/70.5	Illumina Platform	NR	16S rRNA gene sequencing (V3-V5)	Yes
Xu 2021	China	Nasal Swabs	COVID	HC	9/14	6.4/5.6	44.4/67.5	Illumina Platform	NR	16S rRNA gene sequencing ( V4)	Yes
		Throat Swabs			9/14
Bai 2022	Sweden	Nasopharyngeal	COVID(Severe)	No COVID	37/20	61/NR	81.1/NR	Illumina Platform	NR	Metagenomic sequencing	Yes
Bradley 2022	America	Oropharyngeal Samples	COVID	No COVID	74/41	68.1/65	48.7/71	Illumina Platform	-20°C	Metagenome Sequencing
Callahan 2022	America	Saliva	COVID	No COVID	16/90	47.2/52.3	43.8/40	Illumina Platform	NR	16S rRNA gene sequencing ( V1–V3)	Yes
Cui 2022	China	Tongue‑Coating	COVID	HC	28/150	47.9/44.2	35.7/36.7	Illumina Platform	-80°C	16S rRNA gene sequencing ( V3-V5)	NR
Ferrari 2022	Italy	Nasopharyngeal Swabs	COVID	HC	19/35	NR/NR	NR/NR	Illumina Platform	-80°C	16S rRNA gene sequencing (V3-V4)	Yes
Giugliano 2022	Italy	Nasopharynx Swabs	COVID	No COVID	89/25	55/NR	54/NR	Illumina Platform	NR	Next-Generation Sequencing	Yes
Gauthier 2022	China	Nasopharyngeal	COVID(Community-dwelling)	HC(Community-Dwelling)	47/51	61.7/60.9	57.4/47.1	Oxford Nanopore Technologies	NR	16S rRNA gene sequencing	NR
			COVID(Hospitalized )	HC(Hospitalized )	48/48	64.1/61.9	68.8/68.8
Hurst 2022	America	Nasopharyngeal	COVID	No COVID	211/74	NR/9.5	46.9/50	Illumina Platform	-80°C	16S rRNA gene sequencing (v4)	NR
Jitvaropas 2022	Thailand	Saliva	COVID(asymptomatic)	No COVID	39/43	34.7/36.2	59/23	Minion Mk1C	-80°C	16S rRNA gene sequencing	NR
Kumar 2022	India	Nasopharyngeal Swabs	COVID(Deceased)	No COVID	54/44	58/29	74.1/79.6	Sub_x005f_x0002_Systems Technology	NR	16S rRNA gene sequencing ( V1–V3)	Yes
Paine 2022	India	Oropharyngeal Swabs	COVID	HC	20/10	39.6/39.5	50/60	Illumina Platform	isolated strictly within 4–6 h	16S rRNA gene sequencing (V3-V4)	Yes
Prasad 2022	India	Nasopharyngeal	COVID(asymptomatic)	No COVID	25/12	26/31	72/41.7	Oxford Nanopore Long Read Sequencing Platform	-80°C	16S rRNA gene sequencing ( V1–V9)	NR
			COVID(Symptomatic)	No COVID	21/12	32/31	90.5/41.7
			COVID	No COVID	46/12	NR/NR	80.4/41.7
Rattanaburi 2022	Thailand	Nasopharyngeal Swabs	COVID	HC	24/24	36.1/34.5	NR/NR	Illumina Platform	-80°C	16S rRNA gene sequencing (V4)	NR
Rafiqul Islam 2022	Bangladesh	Saliva	COVID	HC	22/15	NR/NR	NR/NR	Illumina Platform	NR	16S rRNA gene sequencing ( V3–V4)	Yes
Rocafort 2022	Spain	Nasopharyngeal	COVID	No COVID	47/126	40/39.9	36.2/36.5	Illumina Platform	NR	16S rRNA gene sequencing ( V3–V4)	NR
			COVID	No COVID	45/425	4.7/4.4	51.1/52
Shi 2022	China	Throat Swab	COVID(Mild)	HC	10/10	NR/NR	50/NR	NR	-80°C	16S rRNA gene sequencing	Yes
Shilts 2022	America	Upper Respiratory Tract	COVID(Mild)	No COVID	27/20	49/31	56/60	Illumina Platform	NR	16S rRNA gene sequencing (V4)	Yes
			COVID(Moderate)	No COVID	28/20	33/31	46/60
			COVID(Severe)	No COVID	15/20	58/31	33/60
Tchoupou Saha 2022	French	Nasopharyngeal Pseudonymized	COVID	No COVID	90/30	57.7/41.2	45.6/46.7	Illumina Platform	NR	16S rRNA gene sequencing ( V3–V4)，	NR
Zacharias 2022	Austria	Lung Tissue	COVID(Deceased)	Control(Deceased	11/14	76.2/74.5	72.7/64.3	Illumina Platform	-80°C	16S rRNA gene sequencing (V4),Internal transcribed spacers sequence	Yes
Zhou 2022-2	China	Oropharyngeal samples	COVID	HC	47/40	44.7/45.8	42.5/50	Illumina Platform	NR	Metatranscriptomic Sequencing	NR
Al-Emran 2023	Bangladesh	Nasopharyngeal samples	COVID	No COVID	4/4	NR/NR	NR/NR	NR	NR	Metagenomic NGS sequencing	Yes
Alqedari 2023	America	Saliva samples	COVID(Mild or Moderate)	No COVID	39/30	NR/NR	51/53	Illumina Platform	-80°C	16S rRNA gene sequencing (V4)	Yes
			COVID(Severe)	No COVID	11/30	NR/NR	73/53
Leftwich 2023	America	Oral swabs	COVID	HC	53/25	NR/NR	0/0	Illumina Platform	NR	16S rRNA gene sequencing (V3-V4)	NR
Hyblova 2023	Slovakia	Nasopharyngeal swab	COVID(Mild)	No COVID	25/72	37/37	52/36.1	Illumina Platform	-80°C	culture-independent RNA sequencing	Yes
			COVID(Severe)	No COVID	30/72	68/37	53.3/36.1
Jiang 2023	China	Throat swab	COVID(Mild or Moderate)	HC	49/37	74.5/57.7	61.2/43.2	Illumina Platform	-80°C	16S rRNA gene sequencing (V3-V4)	NR
			COVID(Severe/Critical)	HC	44/37	81.4/57.7	70.5/43.2
Ling 2023	China	Nasopharyngeal swab and throat swab	COVID(Mild or Moderate)	HC	106/15	49/42	56.6/66.7	Illumina Platform	-80°C	16S rRNA gene sequencing (V3-V4)	Yes
			COVID(Severe/Critical)	HC	51/15	66/42	31.4/66.7
Lu 2023	China	Oropharyngeal microbiome	COVID	HC	144/40	NR/NR	58.3/50	Illumina Platform	-80°C	Metatranscriptomic analysis	Yes
Mahmud 2023	Bangladesh	Nasopharyngeal swab	COVID(Mild)	No COVID	64/12	38.1/36.8	62.5/83.3	Illumina Platform	-20°C	Shotgun metagenomic sequencing analyses	NR
			COVID(Severe)	No COVID	11/12	53.3/36.8	90.9/83.3
Kim 2023	America	Saliva	COVID	No COVID	60/18	54.5/44.9	66.7/55.6	Illumina Platform	-80°C	16S rRNA gene sequencing (V1-V2)	Yes
		Nasopharyngeal Swab	COVID	No COVID	54/12	64.3/57.6	55.6/33.3
Rosas-Salazar 2023	America	Upper respiratory tract samples	COVID	No COVID	24/24	35.5/33	58.3/54.2	Illumina Platform	NR	16S rRNA gene sequencing (V4)	Yes
Wu 2023	China	Oropharyngeal swabs	COVID(Moderate)	HC	30/24	58/57	50/58.3	Illumina Platform	NR	16S rRNA gene sequencing (V3-V4)	NR
			COVID(Severe)	HC	28/24	64.5/57	39.3/58.3
Yasir 2023	Korea	Nasopharyngeal Swab	COVID	No COVID	85/22	44.2/38.4	NR/NR	Illumina Platform	NR	16S rRNA gene sequencing (V3-V4)	NR
Zhang 2023-1	China	Saliva samples	COVID	HC	45/25	40.5/35.6	60/52	Illumina Platform	-80°C	Metagenome sequenc_x005f_x005f_x005f_x005f_x005f_x005f_x005f_x005f_x005f_x005f_x005f_x005f_x005f_x005f_x005f_x005f_x005f_x005f_x005f_x0002_ing	Yes
Covid-19(recovered) vs no Covid-19 control Respiratory tract
Hoque 2021-1	Bangladesh	Nasopharyngeal Tract	COVID(Recovered)	HC	7/7	35/48.1	57.1/71.4	Illumina Platform	-80°C	Metagenome Sequencing	NR
Cui 2022	China	Tongue‑Coating	COVID(Recovered)	HC	28/150	48.9/44.2	35.7/36.7	Illumina Platform	-80°C	16S rRNA gene sequencing ( V3-V5)	NR
Kumar 2022	India	Nasopharyngeal Swabs	COVID(Recovered)	No COVID	43/44	35/29	74.4/79.6	Sub_x005f_x0002_Systems Technology	NR	16S rRNA gene sequencing ( V1–V3)	Yes
Zhou 2022-2	China	Oropharyngeal samples	COVID(Recovered)	HC	47/40	44.7/45.8	42.5/50	Illumina Platform	NR	Metatranscriptomic Sequencing	NR
Wei 2023	China	Throat swab	COVID(Recovered)	HC	23/29	36/37.6	73.9/51.7	Illumina Platform	NR	16S rRNA gene sequencing (V3-V4)	NR
Long Covid-19 vs no Covid-19 control Respiratory tract
Zhang 2023-1	China	Saliva samples	COVID(long COVID-19,follow up)	HC	45/25	40.5/35.6	60/52	Illumina Platform	-80°C	Metagenome sequenc_x005f_x005f_x005f_x005f_x005f_x005f_x005f_x005f_x005f_x005f_x005f_x005f_x005f_x005f_x005f_x005f_x005f_x005f_x005f_x0002_ing	Yes
Covid(severer) vs Covid-19(milder) Gut
Tang 2020	China	Stool	COVID(Severe)	COVID	19/20	66/59	47.4/40	NR	NR	QPCR	NR
			COVID(Critical)	COVID	18/20	68/59	66.7/40	NR
Britton 2021	America	Stool	COVID(Moderate)	COVID(Mild)	22/6	NR/NR	NR/NR	Illumina Platform	-80°C	16S rRNA gene sequencing (v4),Metagenome Sequencing	NR
			COVID(Severe)	COVID(Mild)	16/6	NR/NR	NR/NR
Cao 2021	China	Stool	COVID(Severe)	COVID(Mild)	3/3	66.7/34.3	66.7/66.7	Illumina Platform	NR	Metagenomic sequencing analyses	Yes
Moreira-Rosário 2021	Portugal	Stool	COVID(Severe)	COVID(Mild)	59/19	66/61	72.9/31.6	Ion S5 Sequencer	-80°C	16S rRNA gene sequencing(V3,V4)	Yes
			COVID(Severe)	COVID(Moderate)	59/37	66/71	72.9/64.9
Reinold-2021	Germany	Rectal Swab	COVID(Severe/Critical)	COVID(No Severe)	38/79	20/NR	53/47	NR	-80°C	16S rRNA gene sequencing ( V3–V4)	Yes
Zhou 2021-2	China	Stool	COVID(Fever)	COVID(No Fever)	127/60	37/48	36.2/31.7	Mgi Seq 2000	NR	Metagenome Sequencing	NR
Zuo 2021	China	Stool	COVID(High SARS-COV-2)	COVID(Low Sars-Cov-2)	7/8	NR/NR	NR/NR	Illumina Platform	NR	Shotgun metagenomic sequencing analyses	Yes
Albrich 2022	Switzerland	Stool	COVID(Severe)	COVID(Mild)	89/42	65/58	80.9/38.1	Illumina Platform	-80°C	16S rRNA gene sequencing (V3,V4)	Yes
			COVID(Deceased)	COVID(Mild)	41/42	59.1/58	78/38.1
Gan 2022	China	Stool	COVID(Severe)	COVID(Mild)	4/19	NR/NR	NR/NR	Mgiseq- 2000 Platform	NR	Metagenome Sequencing	Yes
Lai 2022	America	Stool	COVID(Severe)	COVID(Moderate)	79/48	61/58.6	62/47.9	Illumina Platform	-80°C	Metagenome Sequencing	Yes
Liu 2022-2	China	Stool	COVID(Severe)	COVID(No Severe)	63/70	47.1/37.9	52.4/58.6	Illumina Platform	-80°C	Metagenome Sequencing	yes
Maurer 2022	Germany	Stool	COVID(Aspergillus superinfection)	COVID(No Aspergillus Superinfection)	16/26	76.5/61.5	69/58	Illumina Platform	NR	16S rRNA gene sequencing ( V3–V4)	NR
Mazzarelli 2022	Italy	Rectal Swab	COVID(Severe)	COVID(Mild)	50/47	63/57.2	74/59.6	Illumina Platform	-80°C	16S rRNA gene sequencing(V3,V4)	NR
Shen 2022	China	Stool	COVID(ICU)	COVID(No Icu)	20/46	70/51	80/56.5	Illumina Platform	dry ice	Metagenome Sequencing	Yes
Sun 2022	China	Stool	COVID(Severe)	COVID(Mild)	24/39	61/40	79.2/51.3	Illumina Platform	-80°C	Metagenome Sequencing	Yes
Stutz 2022	America	Stool	COVID(Deceased)	COVID(Live)	32/39	66.2/59	60/48.7	Illumina Platform	-80°C	Metagenome Sequencing	Yes
Vestad 2022	Norway	Stool	COVID( respiratory dysfunction)	COVID(No Respiratory Dysfunction)	25/58	NR/NR	NR/NR	Illumina Platform	-80°C	16S rRNA gene sequencing ( V3–V4)	NR
Yokoyama 2022	Japan	Stool	COVID(Critital)	COVID(No Critical)	5/5	57.4/44.4	80/40	Q2-Feature-Classifier	-80°C	16S rRNA gene sequencing ( V3–V4)	NR
Guo 2023	China	Stool	COVID(Moderate)	COVID(Mild)	196/88	NR/NR	NR/NR	Illumina Platform	-80°C	Metagenomic sequencing	NR
			COVID(Severe/Critical)	COVID(Mild)	12/88	NR/NR	NR/NR
Nagata 2023	Japan	Stool	COVID(Severe)	COVID(Mild)	31/43	NR/NR	NR/NR	Illumina Platform	-80°C	Metagenome Sequencing	Yes
Talukdar 2023	India	Stool	COVID(Severe)	COVID(Mild)	45/7	60/45	71.1/85.7	Illumina Platform	-20°C	16S rRNA gene sequencing (V3-V4)	Yes
Trøseid 2023	Norway	Stool	COVID(ICU)	COVID(Ward)	28/95	62/57	68/59	Illumina Platform	-80°C	16S rRNA gene sequencing (V3-V4)	NR
Covid(severer) vs Covid-19(milder) Respiratory tract
Sulaiman1 2021	America	Nasal Swab	COVID(decreased)	COVID( Mechanical Ventilation ≤28 Days)	34/52	64/59	73.5/76.9	Illumina Platform	DNA/RNA Shield	Metagenome and Metatranscriptome	Yes
			COVID(decreased)	COVID( Mechanical Ventilation >28 Days)	34/64	64/NR	73.5/82.1
Rosas-Salazar 2021	America	Upper Respiratory Tract	COVID(high SARS-CoV-2 vi V ral load)	COVID(Low Sars-Cov-2 Vir V Al Load)	NR/NR	NR/NR	NR/NR	Illumina Platform	NR	16S rRNA gene sequencing (V4)	Yes
Chen 2022	China	Respiratory Tract	COVID(Severe)	COVID(Mild)	28/41	71/57	57.1/34.1	Illumina Platform	-80°C	16S rRNA gene sequencing ( V3–V4)	NR
Devi 2022	India	Nasopharyngeal	COVID(Moderate)	COVID(Mild)	36/24	NR/NR	NR/NR	Illumina Platform	NR	Metatranscriptomic analysis	NR
			COVID(Severe)	COVID(Mild)	14/24	NR/NR	NR/NR
			COVID(Deceased)	COVID(Mild)	12/24	NR/NR	NR/NR
Gan 2022	China	Nasopharyngeal	COVID(Severe)	COVID(Mild)	5/24	NR/NR	NR/NR	Mgiseq- 2000 Platform	NR	Metagenome Sequencing	Yes
		Oropharyngeal	COVID(Severe)	COVID(Mild)	14/58	NR/NR	NR/NR
Pozzi 2022	Italy	Saliva	COVID( hospitalized)	COVID(Non Hospitalized)	25/23	68.2/41.4	76/34.8	Illumina Platform	NR	16S rRNA gene sequencing (V3-V4)	Yes
Qin 2022	China	Upper Respiratory Tracts	COVID(Severe)	COVID(Mild)	51/20	NR/NR	NR/NR	Illumina Platform	-80°C	16S rRNA gene sequencing (V3-V4)	NR
		Lower Respiratory Tracts	COVID(Severe)	COVID(Mild)	51/20	NR/NR	NR/NR
Shen 2022	China	Saliva	COVID(ICU)	COVID(No Icu)	20/46	70/51	80/56.5	Illumina Platform	dry ice	Metagenome Sequencing	Yes
Ventero1 2022	Spain	Nasopharyngeal	COVID(Deceased)	COVID(Live)	31/146	NR/NR	NR/NR	Illumina Platform	-80°C	16S rRNA gene sequencing ( V3,V4)	NR
Alqedari 2023	America	Saliva samples	COVID(Severe)	COVID(No Severe)	11/39	NR/NR	73/51	Illumina Platform	-80°C	16S rRNA gene sequencing (V4)	Yes
Larios Serrato 2023	America	Saliva samples	COVID(Severe)	COVID(Mild)	57/103	50.8/41	66/43.5	Illumina Platform	-70°C	16S rRNA gene sequencing (V1-V3)	Yes
			COVID(Deceased)	COVID(Mild)	18/103	74.4/41	76.7/43.5
Covid-19 vs no Covid-19 disease Gut
Gu 2020	China	Stool	COVID	H1N1	30/24	55/48.5	43.3/37.5	Illumina Platform	-80°C	16S rRNA gene sequencing ( V3-V4)	Yes
Mazzarelli 2021	Italy	Rectal Swab	COVID(ICU)	Non-COVID-19 Pneumonia	6/8	70/69	50/62	Ion 530 Chip	-80°C	16S rRNA gene sequencing (V2, V4, V8 and V3-6, 7–9)	Yes
			COVID(wards)	Non-COVID-19 Pneumonia	9/8	67/69	55/62
Newsome 2021	America	Stool	COVID	No COVID Patients	50/34	62.3/55	56/41	Illumina Platform	-80°C	16S rRNA gene sequencing (V1-V3)	Yes
Reinold-2021	Germany	Rectal Swab	COVID	No COVID Patients	117/95	56/50	49/52	NR	-80°C	16S rRNA gene sequencing ( V3–V4)	Yes
Cuenca 2022	Spain	Stool、Rectal Swab	COVID(ICU)	No COVID(Icu)	46/32	61/58	70/32.5	Illumina Platform	-80°C	16S rRNA gene sequencing ( V4)	Yes
Romani 2022	Italy	Stool	COVID	No COVID Patients	68/16	6.5/4.4	56/53	Illumina Platform	-80°C	16S rRNA gene sequencing (V3-V4)	Yes
Chen 2023	China	Stool	COVID	No COVID Patients	27/22	54.9/45.4	40.7/50	Ion Torrent Proton Sequencer	NR	Metagenomic sequencing	Yes
Covid-19 vs no Covid-19 disease Respiratory tract
Gaibani 2021-2	Italy	Bronchoalveolar Lavage	COVID	Non-COVID-19 Pneumonia	24/24	68/64	71/61	Illumina Platform	NR	16S rRNA gene sequencing (V3-V4)	Yes
Hoque 2021-2	Bangladesh	Nasopharyngeal	COVID	Copd, Upper Respiratory Tract Infection	11/10	NR/NR	NR/NR	Illumina Platform	-20°C	Metagenomic sequencing analyses	NR
Liu 2021	China	Nasopharyngeal Swabs	COVID	No COVID Patients	9/6	38.9/45.3	44.1/76.7	Illumina Platform	-80°C	Metagenomic sequencing	NR
Ma 2021	China	Oropharynx Swab Specimens	COVID	Influenza B	31/29	50/59	54.8/69	Mgiseq-2000 Platform	NR	Metagenome Sequencing	Yes
Merenstein 2021	America	Oropharyngeal	COVID	No COVID Patients	83/13	64/60	53/69	Illumina Platform	NR	16S rRNA gene sequencing (V1,V2)	Yes
		Nasopharyngeal
Miller 2021	America	Saliva	COVID	No COVID Patients	46/54	56.5/56.2	45.3/61	Illumina Platform	-80°C	16S rRNA gene sequencing ( V1–V2)	Yes
Rhoades 2021	America	Nasal	COVID	No COVID Patients	68/21	54.3/58.2	63.1/47.6	Illumina Platform	NR	16S rRNA gene sequencing (v4)	Yes
Xiong 2021	China	Pharyngeal Swabs	COVID	No COVID Patients	11/11	45.6/52	36.4/45.5	MGI-seq2000 platform	NR	Metagenome sequencing _x0002_	NR
Zhang 2021	China	Nasopharyngeal Swabs	COVID	Non-COVID-19 Pneumonia	24/36	47.3/47.2	54.2/47.2	Illumina Platform	NR	RT-PCR，Metatranscriptomic sequencing	Yes
		Sputum			14/39	57.8/49.4	78.6/69.8
Meng 2022	China	Nasopharyngeal Swabs	COVID	Non-COVID-19 pneumonia	72/65	NR/NR	NR/NR	Illumina Platform	-70°C	Metatranscriptomic sequencing	NR
Rattanaburi 2022	Thailand	Nasopharyngeal Swabs	COVID	Influenza A	24/24	36.1/26	NR/NR	Illumina Platform	-80°C	16S rRNA gene sequencing (V4)	NR
				Influenza B	24/24	36.1/26.5	NR/NR				NR
Javan 2023	America	Lung Tissue	COVID(Deceased)	No COVID Patients(Deceased)	20/20	62.3/77.9	60/30	Illumina Platform	-80°C	16S rRNA gene sequencing (V4)	Yes
Xie 2023	China	Sputum and bronchoalveolar lavage fluid	COVID	Non COVID Pneumonia	38/26	61.2/57	76.3/73.1	Oxford Nanopore MinION	-80°C	Nanopore-targeted sequencing	Yes
[truncated: 453 more columns]

## Sheet: Supplementary Table S6
First author & publication year	Selection				Comparability		Exposure
	Is the Case Definition Adequate?	Representativeness of the Cases	Selection of Controls	Definition of Controls	Comparability of baseline characteristic 1 (Sex)	Comparability of baseline characteristic 2 (age)	Ascertainment of Exposure	Same method of ascertainment for cases and controls	Non-Response rate	Total
Li 2017	*	*	*	*	NR	*	NR	NR	*	6
Qin 2015	*	*	*	NR	*	*	NR	NR	*	6
Lu 2017	*	*	*	*	*	*	NR	NR	*	7
Ramos-Sevillano 2018	*	*	*	*	NR	NR	NR	NR	*	5
Wen 2018	*	*	*	*	NR	*	NR	NR	*	6
Ding 2019	*	*	*	*	NR	NR	NR	NR	*	5
Gu 2020	*	*	*	*	*	*	NR	NR	*	7
Qin 2020	*	*	*	NR	NR	NR	NR	NR	*	4
Zhou 2020	*	*	*	*	NR	*	NR	NR	*	6
Al Khatib 2021	*	*	*	*	NR	*	NR	NR	*	6
Fuentes 2021	*	*	*	*	*	NR	NR	NR	*	6
Ma 2021	*	*	*	NR	NR	NR	NR	NR	*	4
Hu 2022	*	*	*	*	*	*	NR	NR	*	7
Rattanaburi 2022	*	*	*	*	NR	*	NR	NR	*	6
Shetty 2022	*	*	*	*	NR	NR	NR	NR	*	5
Li 2023	*	*	*	NR	*	NR	NR	NR	*	5
Zhang 2023	*	*	*	*	*	*	NR	NR	*	7
Zhou 2023	*	*	*	*	*	*	NR	NR	*	7
NR=not reported

## Sheet: Supplementary Table S7
First author & publication year	Country	Specimen	Disease	Control	Numbel (D/C)	Age (D/C)	Male % ( D/C)	Sequencing platform	Preservation condition	Microbiome assessment method	Multiple comparisons correction?	α-microbial diversity										β-microbial diversity						Phylum										Actinobacteria	Actinomycetales	Actinomyces	Acidobacteria	Actinomyces viscosus	Actinomyces timonensis	Actinomyces oris	Actinomyces naeslundii	Actinomyces massiliensis	Actinomyces johnsonii	Actinomyces graevenitzii	Actinomyces cardiffensis
												α-microbial diversity of bacterial species	Faith’s phylogenetic index	observed ASVs	Abundance	Richness	Shannon index	Inverse Simpson index	Chao1 index	PD-whole-tree	ACE	Binary euclidean distance	Bray-Curtis distances	Jaccard distances	Binary-Jaccard distances	Weighted UniFrac distance	Unweighted UniFrac distance	Actinobacteria	Bacteroidetes	Cyanobacteria	Deferribacteres	Firmicutes	Proteobacteria	Tenericutes	Synergistetes	Verrucomicrobia	Firmicutes/Bacteroidetes ratio
Influenza patients vs no Influenza patients Gut sample
Qin 2015	China	Stool	H7N9(Antibiotic treatment)	HCs	17/31	60.4/57.5	76.5/67.7	Illumina platform	–80∘ C	Next generation sequencing	NR
			H7N9(No Antibiotic treatment)	HCs	9/31	51.6/57.5	66.7/67.7
Gu 2020	China	Stool	HINI	HC	24/30	48.5/53.5	37.5/43.3	Illumina Platform	-80°C	16S rRNA gene sequencing ( V3-V5)	Yes
Al Khatib 2021	Qatar	Stool	influenza	HCs	38/11	31/34	100/100	Miseq platform	–80∘ C	16S rRNA gene sequence(V4)	NR
Fuentes 2021	Netherlands	Stool	Infuenza-like illness	no Infuenza-like illness control	213/184	69.2/71.3	47/50	Illumina platform	NR	16S rRNA gene sequence(V4)	Yes
Influenza patients vs no Influenza patients Respiratory tract sample
Li 2017	China	Pharyngeal swab	HINI	HCs	100/30	15.6/16.5	62/53.3	Illumina platform	NR	16S rRNA gene sequence(V3-V4)	NR
			Non-H1N1 influenza	HCs	72/30	13.4/16.5	58.3/53.3
Lu 2017	China	oropharyngeal	H7N9(Secondary bacterial lung infection)	HCs	21/30	60.5/50	42.9/36.7	Illumina platform	NR	16S rRNA gene sequence(V3-V4)	NR
Ramos-Sevillano 2018	United Kingdom	Nasopharyngeal swabs	Infuenza-like illness,influenza	HCs	33/24	NR/NR	NR/NR	Agilent	NR	16S rRNA gene sequence(V1-V3)	Yes
Wen 2018	China	Nasopharyngeal	Infuenza A virus patients	HCs	121/59	2.9/2.8	61.2/44.1	Illumina platform	–80∘ C	16S rRNA gene sequence(V3-V4)	Yes
		oropharyngeal	Infuenza A virus patients	HCs	121/59	2.9/2.8	61.2/44.1
Ding 2019	America	nasopharyngeal	influenza	No influenza controls	214/40	51.2/34.7	45.3/37.5	Illumina platform	–20∘ C	16S rRNA gene sequence(V4)	NR
Qin 2020	China	nasopharyngeal samples	influenza(mild)	HCs	21/24	56.4/59	52.4/54	Illumina platform	−70 ∘ C	16S rRNA gene sequence(V3-V4)	Yes
			influenza(severe)	HCs	31/24	61.7/59	56.7/54
Zhou 2020	China	nasopharyngea	influenza	HCs	66/59	NR/NR	NR/NR	NR	NR	16S rRNA gene sequence(V3-V4)	NR
		oropharyngeal	influenza	HCs	66/59	NR/NR	NR/NR
Ma 2021	China	oropharynx swab specimens	Influenza B	HC	29/28	59/37	69/42.9	MGISEQ-2000 platform	NR	Metagenome Sequencing	Yes
Hu 2022	China	Oropharyngeal swab	Influenza A virus pneumonia	HCs	49/42	39/41.1	67.3/59.5	Illumina platform	–80∘ C	16S rRNA gene sequence(V3-V4)	Yes
Rattanaburi 2022	Thailand	Nasopharyngeal Swabs	influenza A	HC	24/24	26/34.5	NR/NR	Illumina Platform	-80°C	16S rRNA gene sequencing (V4)	NR
			influenza B	HC	24/24	26.5/34.5
Shetty 2022	Netherlands	Nasopharyngeal (NP) swabs	Infuenza-like illness	no Infuenza-like illness control	240/157	69.5/71.4	47.9/51	Illumina platform	NR	16S rRNA gene sequence(V4)	Yes
			H7N9(No Secondary bacterial lung infection)	HCs	51/30	53/50	56.7/36.7
Li 2023	China	oropharyngeal samples	influenza A	HCs	22/98	29/31.5	50/8.2	Illumina Platform	-80°C	16S rRNA gene sequence(V4)	Yes
			influenza B	HCs	138/98	29/31.5	47.8/8.2
Zhang 2023	America	nasal and throat swabs	influenza	No influenza controls	42/93	6/14	52/20	Illumina Platform	-80°C	metagenome sequencing	Yes
Zhou 2023	China	bronchoalveolar lavage fuid	influenza	No influenza controls	42/42	64.2/59.1	78.6/78.6	Illumina Platform	-80°C	16S rRNA gene sequence(V3-V4)	NR
[truncated: 453 more columns]
